# Supplementary material for: Association of COVID-19 Vaccination With Influenza Vaccine History and Changes in Influenza Vaccination
Source: PubMed Central journal article supplement (PMC9664264; doi:10.1001/jamanetworkopen.2022.41888), 2022-11-14
Supplement: jamanetwopen-e2241888-s001.pdf [file jamanetwopen-e2241888-s001.pdf]

## Supplemental Online Content

Parker AM, Atshan S, Walsh MM, Gidengil CA, Vardavas R. Association of COVID-19 vaccination with influenza vaccine history and changes in influenza vaccination. *JAMA Netw Open*. 2022;5(11):e2241888. doi:10.1001/jamanetworkopen.2022.41888

### **eMethods.** Supplementary Materials

This supplemental material has been provided by the authors to give readers additional information about their work.

**eMethods.** Supplementary Materials

Respondents come from an ongoing longitudinal survey on the RAND American Life Panel (ALP). Initially, 2179 ALP panelists (84% completion amongst panelists invited to participate) were recruited in 2016, with surveys twice a year for four years (through Summer of 2020). Influenza vaccination for the prior season was assessed each Spring-Summer. Walsh et al (2020) combined data from the first year of this study (2016-2017) with prior ALP surveys to classify ALP panelists as never, sometimes, or always influenza vaccinators. The 2019-2020 influenza vaccination data were from the eighth and final wave of this study (n=1643, 75% of the initial 2179).

A follow-on study recruited all participants in the prior study that remained in the ALP, along with a refresh subsample not considered here. COVID-19 vaccination and 2020-2021 and 2021-2022 influenza vaccination data come from the first survey wave in this follow-on study (n=1405, 64.4% retention). Table S1 breaks down the original 2179 sample, comparing those in and not in the current analytic sample.

Table S1. Demographic comparison of original 2016 respondents retained and not retained in the analytic sample.

| Characteristic                                                                                                                                                                                                      | Retained<br>No. (%) | Not Retained<br>No. (%) | p-value <sup>1</sup> |
|---------------------------------------------------------------------------------------------------------------------------------------------------------------------------------------------------------------------|---------------------|-------------------------|----------------------|
| Subsample size                                                                                                                                                                                                      | 1,366               | 813                     |                      |
| NSA Status                                                                                                                                                                                                          |                     |                         | 0.27                 |
| Never                                                                                                                                                                                                               | 497 (36.4)          | 322 (39.9)              |                      |
| Sometimes                                                                                                                                                                                                           | 447 (32.7)          | 246 (30.4)              |                      |
| Always                                                                                                                                                                                                              | 422 (30.9)          | 241 (29.8)              |                      |
| Unknown                                                                                                                                                                                                             | 0                   | 4                       |                      |
| Sex                                                                                                                                                                                                                 |                     |                         | 0.95                 |
| Male                                                                                                                                                                                                                | 595 (43.6)          | 353 (43.5)              |                      |
| Female                                                                                                                                                                                                              | 771 (56.4)          | 460 (56.6)              |                      |
| Age, Mean (SD)                                                                                                                                                                                                      | 56 (13.0)           | 56 (15.6)               | 0.90                 |
| Married                                                                                                                                                                                                             | 852 (62.4)          | 448 (55.1)              | <0.001               |
| Hispanic                                                                                                                                                                                                            | 156 (11.4)          | 151 (18.6)              | <0.001               |
| Race                                                                                                                                                                                                                |                     |                         | <0.001               |
| Asian <sup>2</sup>                                                                                                                                                                                                  | 33 (2.4)            | 22 (2.7)                |                      |
| Black                                                                                                                                                                                                               | 101 (7.4)           | 95 (11.7)               |                      |
| White                                                                                                                                                                                                               | 1,161 (85.1)        | 623 (76.6)              |                      |
| Other                                                                                                                                                                                                               | 70 (5.1)            | 73 (9.0)                |                      |
| Unknown                                                                                                                                                                                                             | 1                   | 0                       |                      |
| Education                                                                                                                                                                                                           |                     |                         | <0.001               |
| HS or Less                                                                                                                                                                                                          | 177 (12.9)          | 166 (20.4)              |                      |
| Some College                                                                                                                                                                                                        | 490 (35.9)          | 316 (38.9)              |                      |
| BS or more                                                                                                                                                                                                          | 699 (51.2)          | 331 (40.7)              |                      |
| Unemployed                                                                                                                                                                                                          | 55 (4.0)            | 41 (5.0)                | 0.26                 |
| <sup>1</sup> Bivariate comparisons using Pearson's Chi-squared tests (categorical variables) and Wilcoxon rank sum test (Age)<br><sup>2</sup> Includes American Indian or Alaskan Native and self-reported "Other". |                     |                         |                      |
